# Supplementary material for: Meat consumption providing a surplus energy in modern diet contributes to obesity prevalence: an ecological analysis
Source: Springer Nature journal article supplement (doi:10.1186/s40795-016-0063-9), 2016-04-18
Supplement: 40795_2016_63_MOESM4_ESM.pdf [file 40795_2016_63_MOESM4_ESM.pdf]

Table S4 Countries included in Latin America in our study.

Based on region primarily speaking romance languages, Latin America contains the following countries.

|                                    |
|------------------------------------|
| Argentina                          |
| Bolivia (Plurinational State of)   |
| Brazil                             |
| Chile                              |
| Colombia                           |
| Costa Rica                         |
| Cuba                               |
| Dominican Republic                 |
| Ecuador                            |
| El Salvador                        |
| Guatemala                          |
| Haiti                              |
| Honduras                           |
| Mexico                             |
| Nicaragua                          |
| Panama                             |
| Paraguay                           |
| Peru                               |
| Uruguay                            |
| Venezuela (Bolivarian Republic of) |
