# Supplementary material for: Meat consumption providing a surplus energy in modern diet contributes to obesity prevalence: an ecological analysis
Source: Springer Nature journal article supplement (doi:10.1186/s40795-016-0063-9), 2016-04-18
Supplement: 40795_2016_63_MOESM6_ESM.pdf [file 40795_2016_63_MOESM6_ESM.pdf]

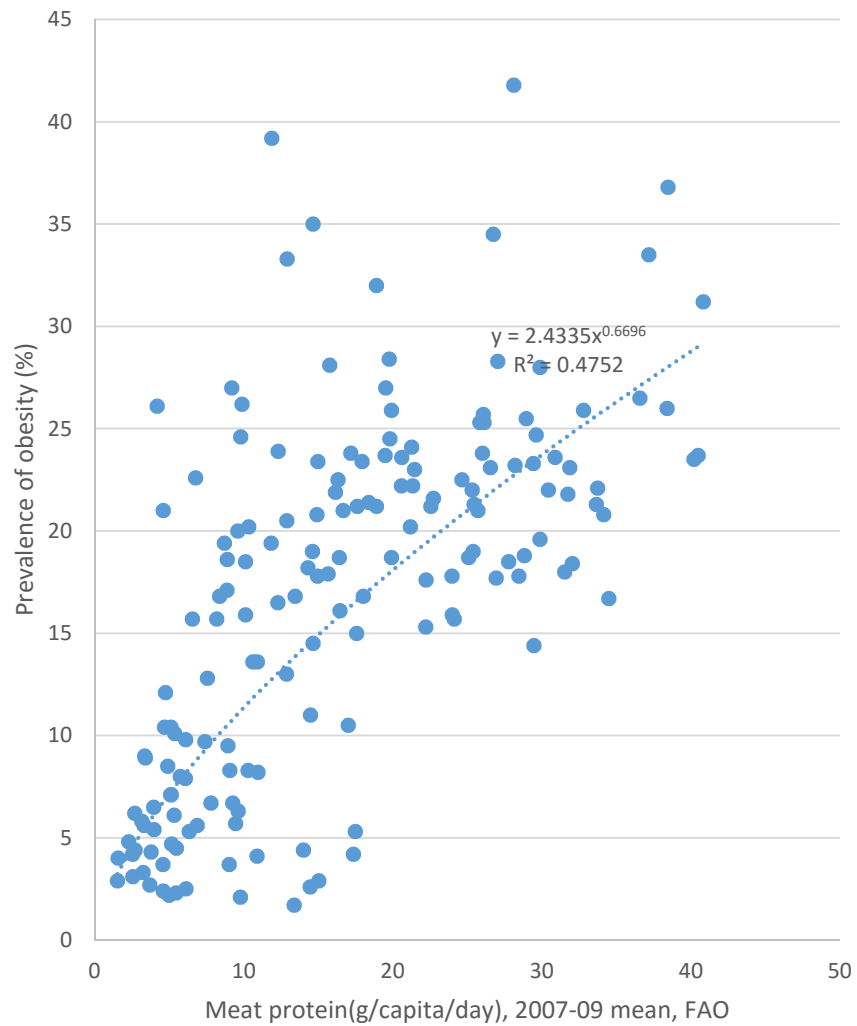

a. Relationship between meat protein availability and obesity prevalence

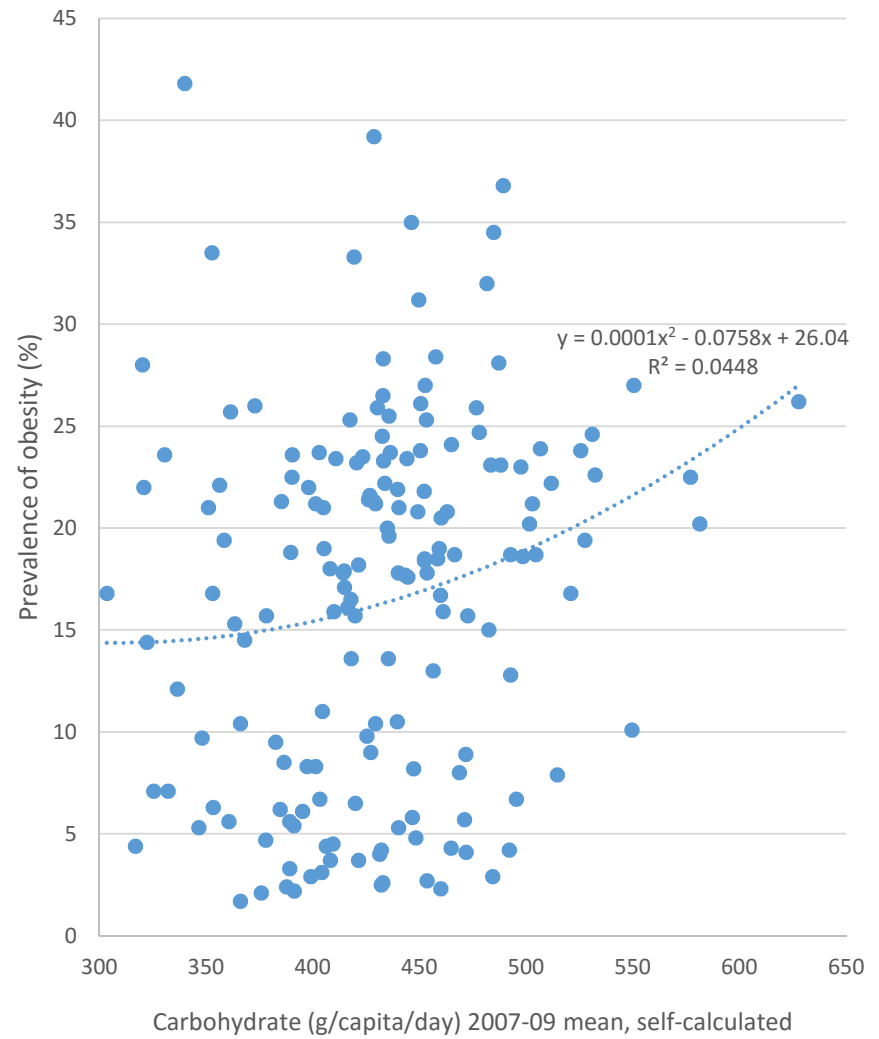

b. Relationship between animal fats availability and obesity prevalence

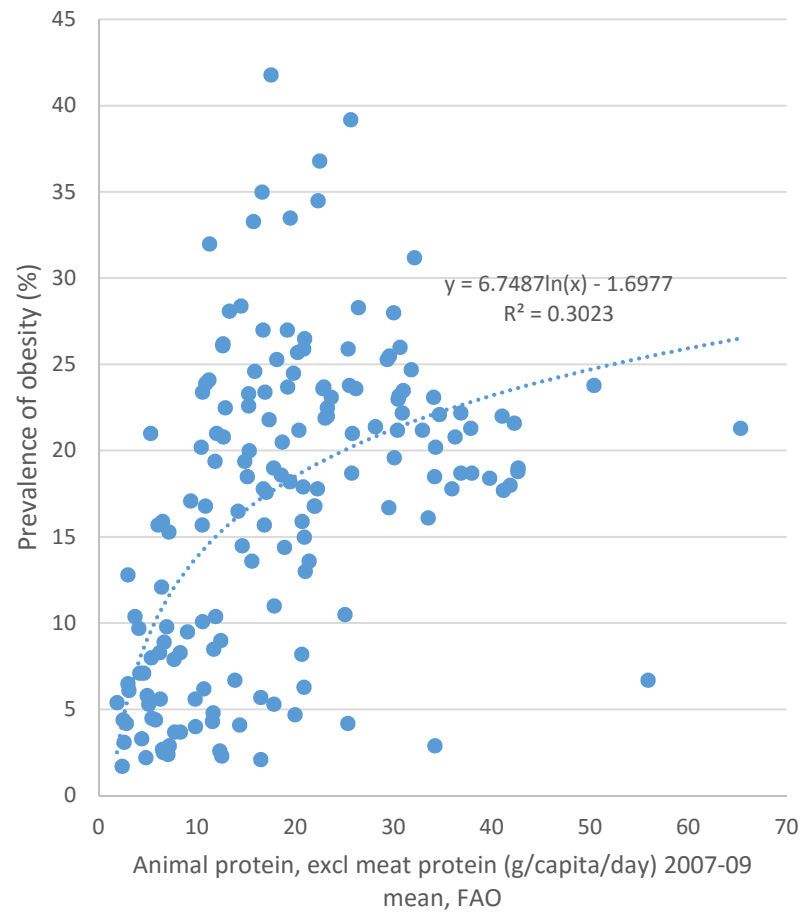

c. Relationship between animal protein (excl. meat protein) availability and obesity prevalence

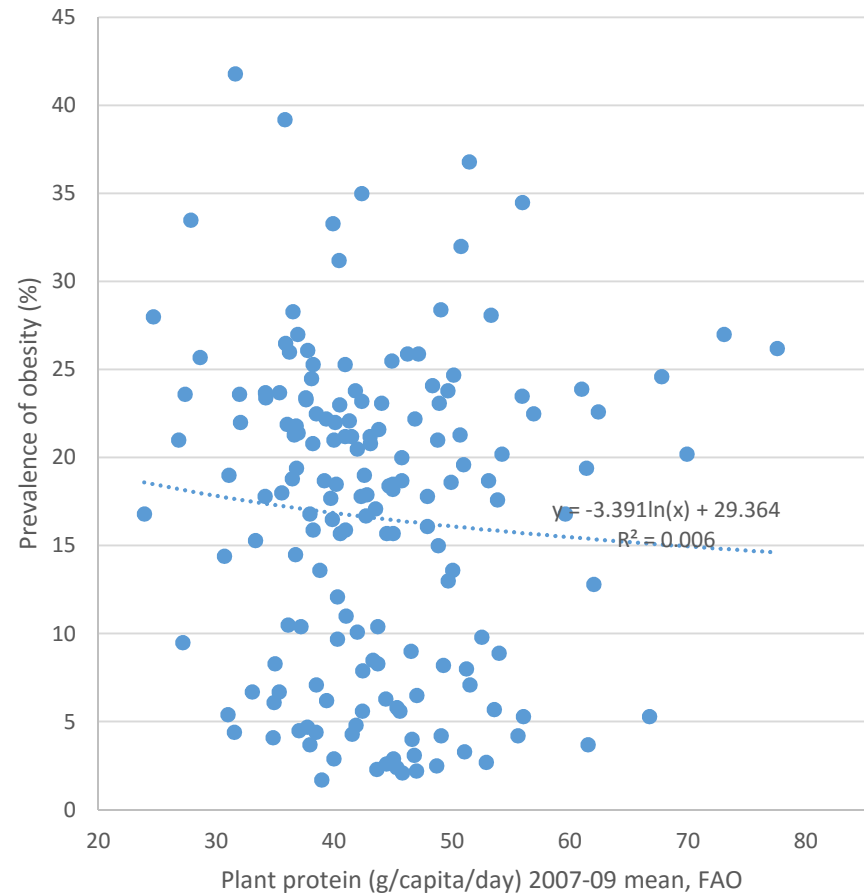

d. Relationship between plant protein availability and obesity prevalence

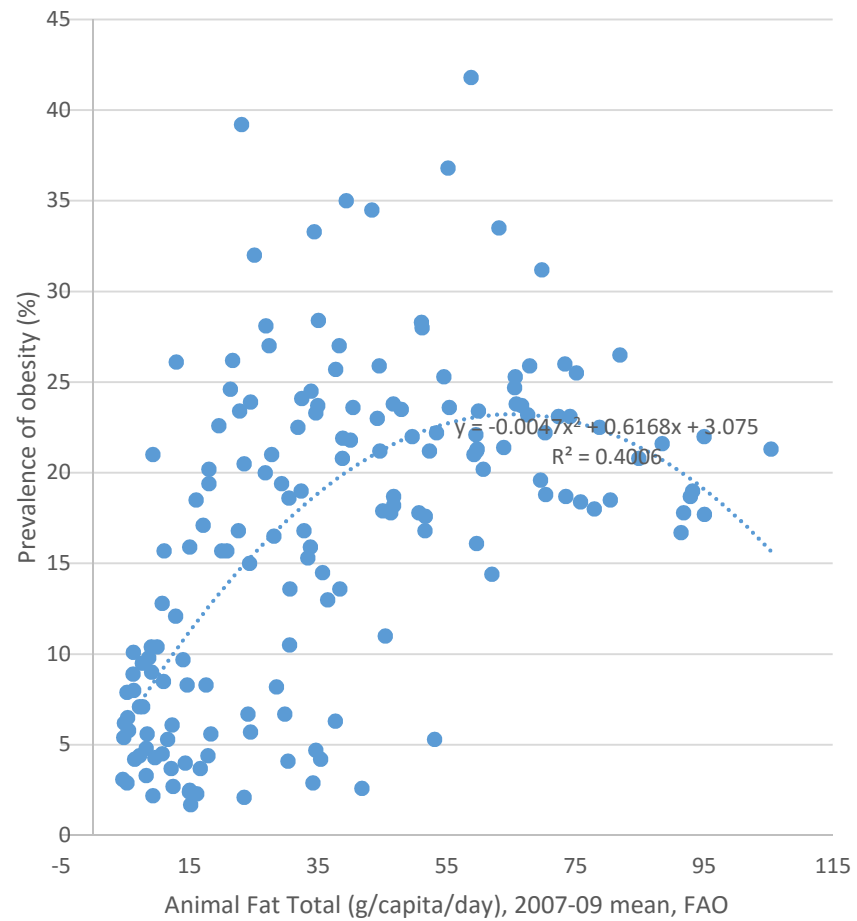

e. Relationship between animal fats availability and obesity prevalence

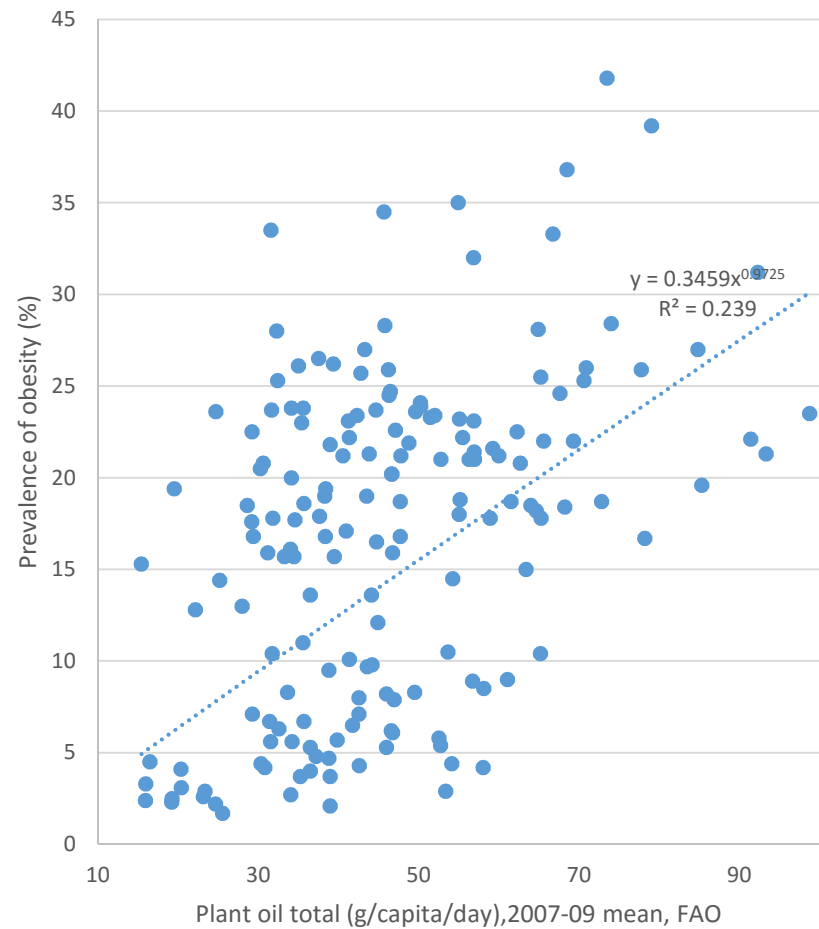

f. Relationship between plant oil availability and obesity prevalence
